# Supplementary material for: Controllable self-assembly of four new metal–organic frameworks based on different phosphomolybdate clusters by altering the molar ratio of H3PO4 and Na2MoO4
Source: Royal Society of Chemistry journal article supplement (doi:10.1039/c0ce00639d), 2011-01-01
Supplement: c0ce00639d.pdf [file c0ce00639d.pdf]

**Controllable self-assembly of four new metal-organic frameworks  
based on different phosphomolybdate clusters by altering molar ratio  
of  $\text{H}_3\text{PO}_4$  and  $\text{Na}_2\text{MoO}_4$**

**Jing-Xin Meng, Ying Lu<sup>\*</sup>, Yang-Guang Li, Hai Fu, En-Bo Wang<sup>\*</sup>**

Key Laboratory of Polyoxometalate Science of Ministry of Education, Department of Chemistry, Northeast Normal University, Ren Min Street No.5268, Changchun, Jilin 130024, P.R. China. E-mail: wangeb889@nenu.edu.cn, wangenbo@public.cc.jl.cn

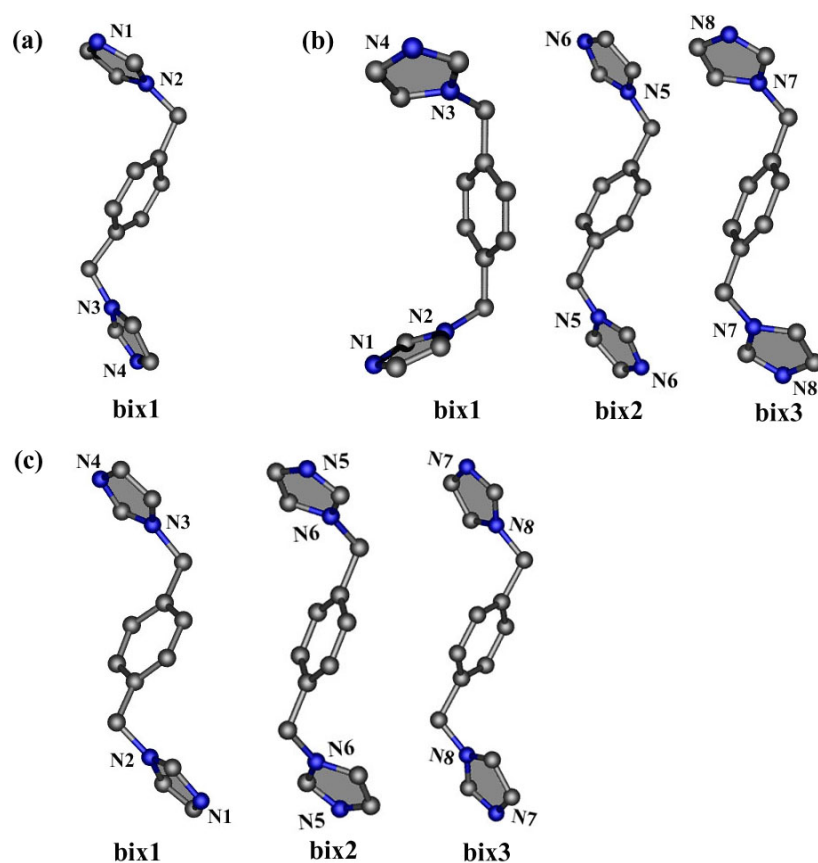

**Fig. S1.** The detailed conformations of bix ligands in compounds 1-3.

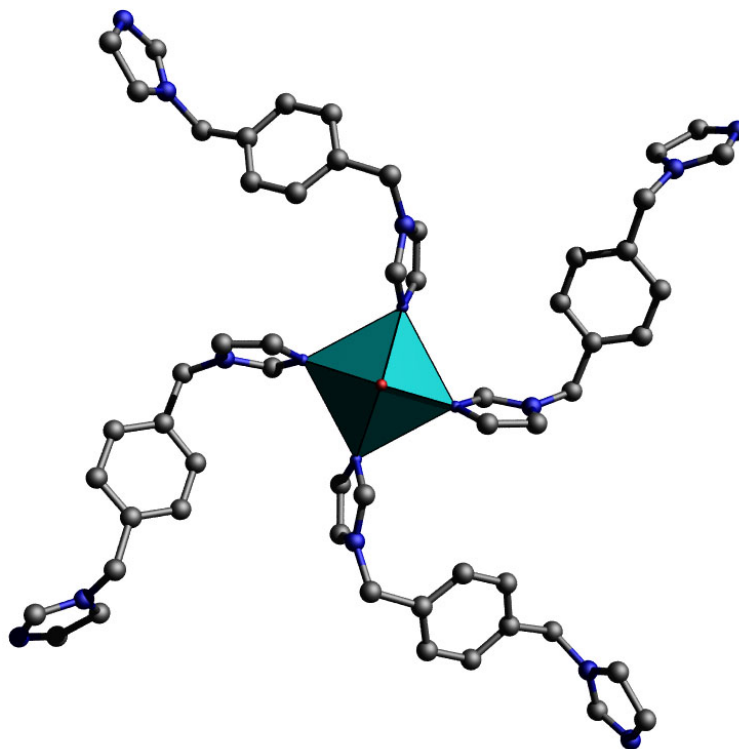

**Fig. S2.** Polyhedral and ball-and-stick representation of the propeller-shaped structures of the  $[\text{CoH}(\text{bix})_4]^{3+}$  complex fragments in compound **1**.

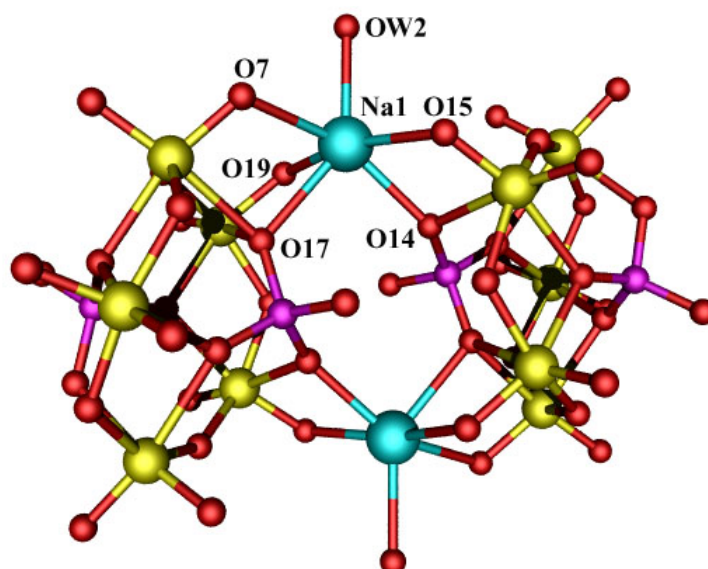

**Fig. S3.** Ball-and-stick representation of a centrosymmetric dimer  $\text{Na}_2(\text{P}_2\text{Mo}_5)_2$  in compound **2**.

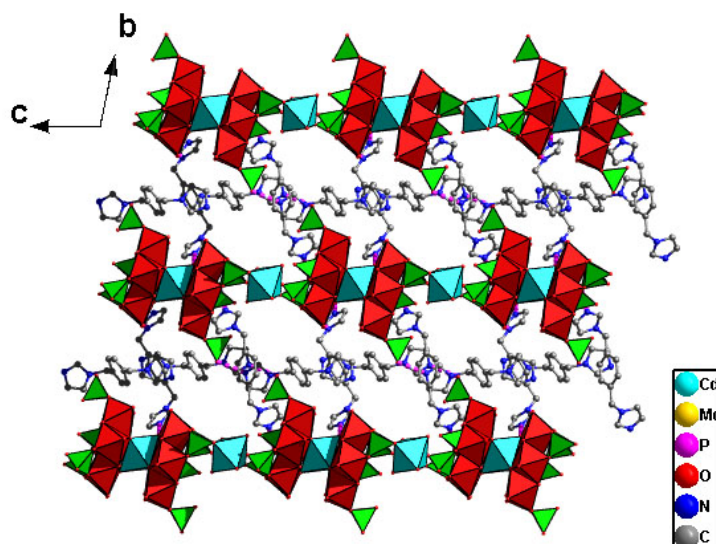

**Fig. S4.** Polyhedral and ball-and-stick representation of the 2D supramolecular layer in **3** along (1,0,0) axis.

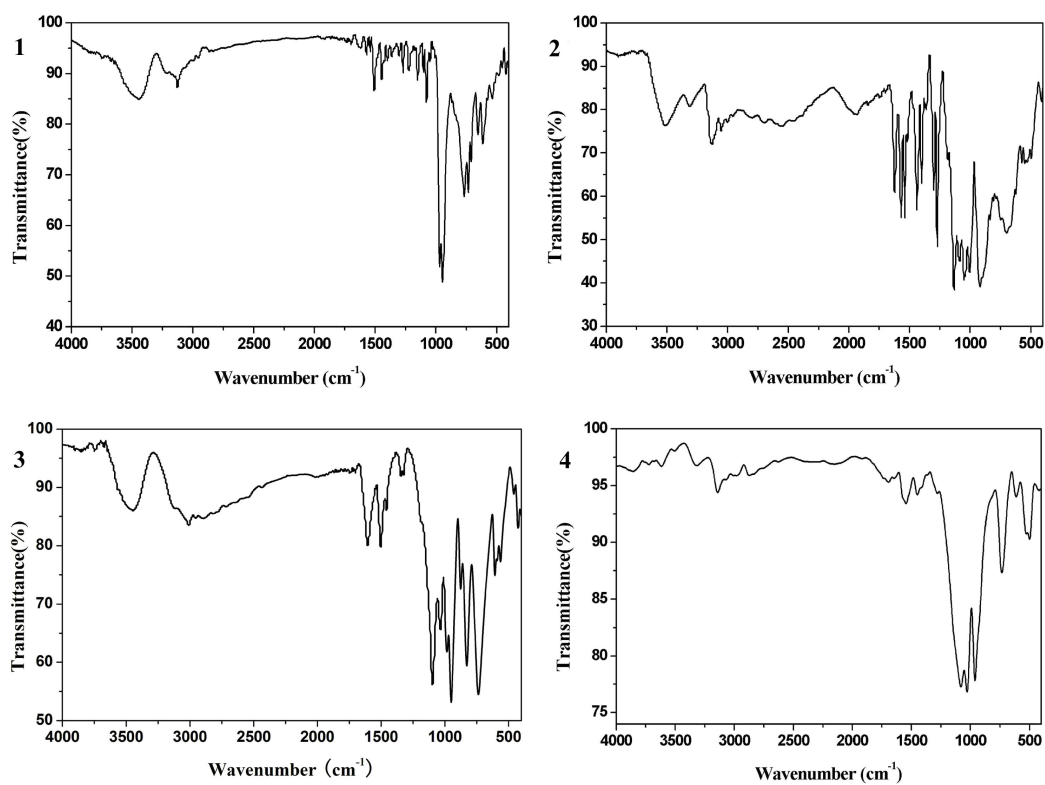

**Fig. S5.** The IR spectra of compounds **1-4**.

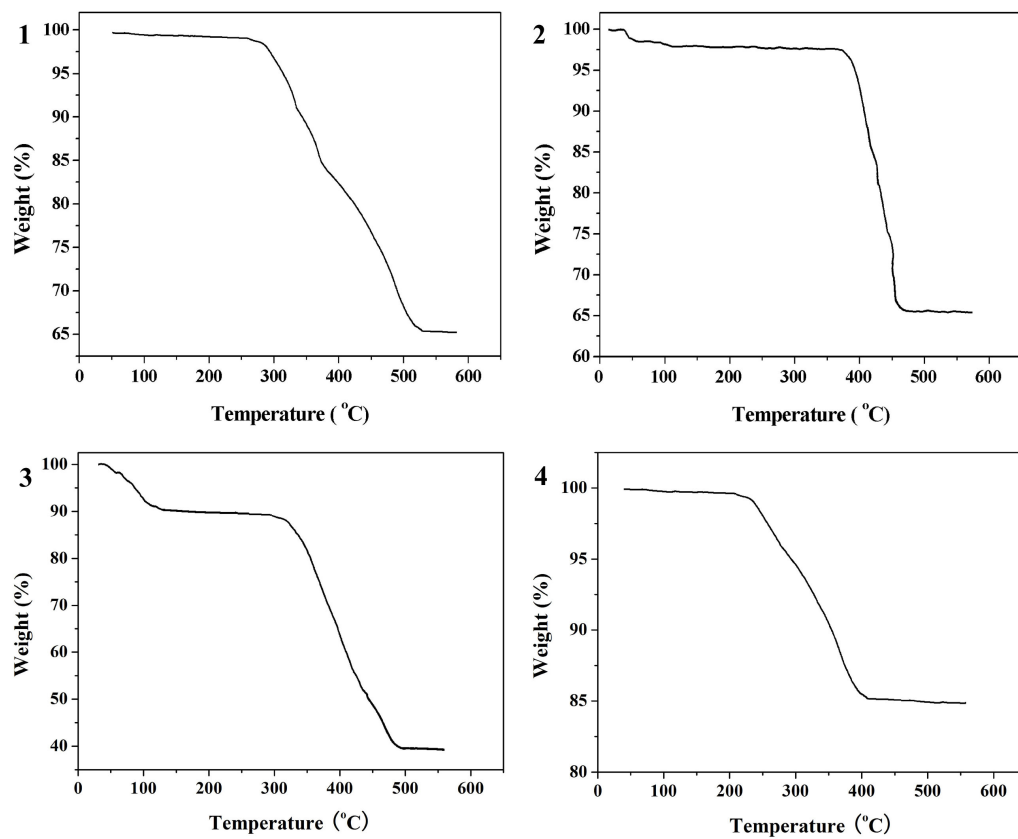

**Fig. S6.** The TG curves of compounds 1-4.

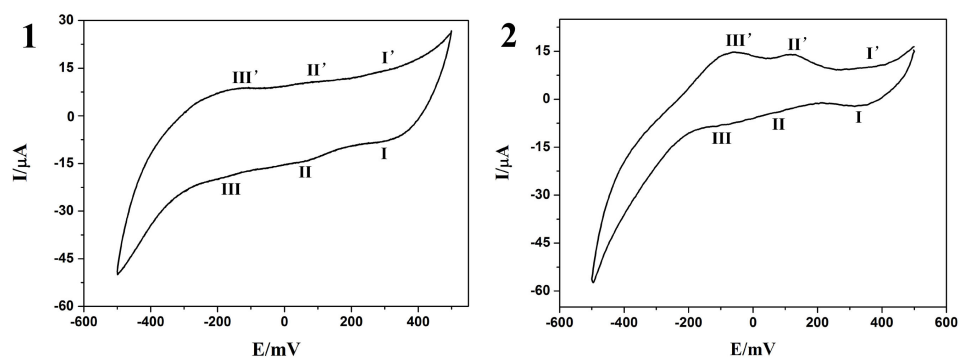

**Fig. S7.** The electrochemical properties of compounds **1** and **2**.

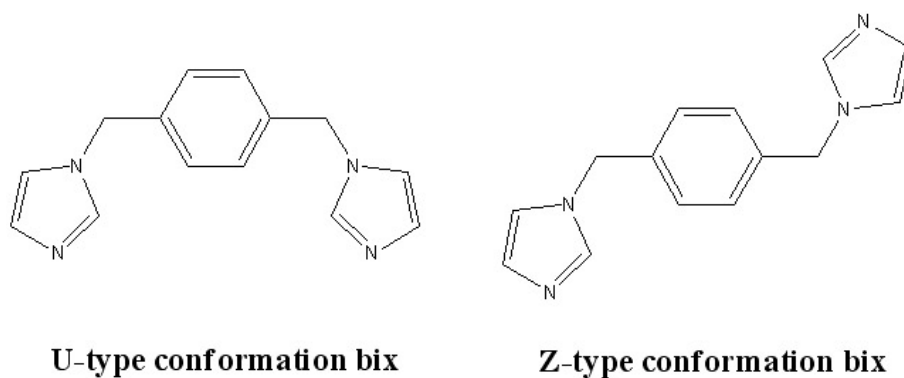

**Fig. S8.** The scheme view of two conformations of bix ligands.

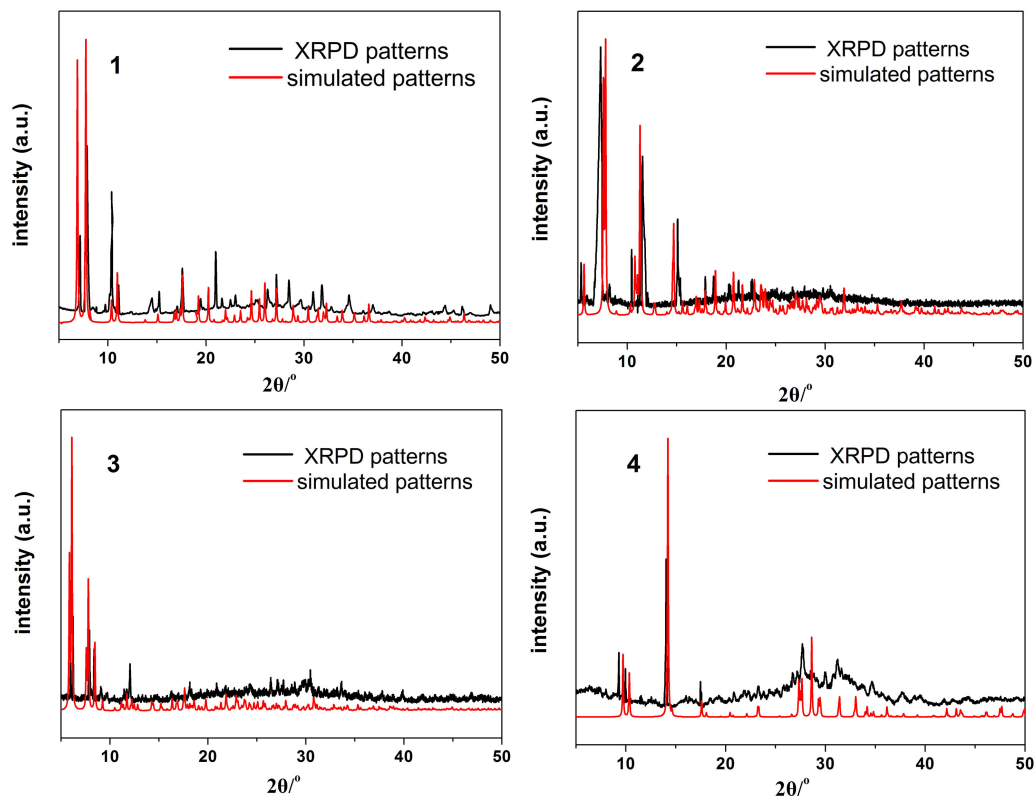

**Fig. S9.** XRPD patterns and simulated patterns for compounds **1-4**.

**Table S1.** Selected bond lengths (Å) for compound 1.

|              |          |              |          |
|--------------|----------|--------------|----------|
| Mo(1)-O(4)   | 1.689(3) | Mo(2)-O(6)   | 1.683(3) |
| Mo(1)-O(9)   | 1.808(3) | Mo(2)-O(3)   | 1.808(3) |
| Mo(1)-O(1)   | 1.814(3) | Mo(2)-O(8)   | 1.818(3) |
| Mo(1)-O(7)#1 | 2.052(3) | Mo(2)-O(7)   | 2.052(3) |
| Mo(1)-O(5)   | 2.057(3) | Mo(2)-O(5)   | 2.056(3) |
| Mo(1)-O(10)  | 2.437(3) | Mo(2)-O(10)  | 2.440(3) |
| V(1)-O(11)   | 1.608(3) | V(2)-O(2)    | 1.628(4) |
| V(1)-O(9)#3  | 1.922(3) | V(2)-O(7)#1  | 1.893(3) |
| V(1)-O(8)#2  | 1.930(3) | V(2)-O(7)    | 1.893(3) |
| V(1)-O(3)    | 1.937(3) | V(2)-O(5)#1  | 1.967(3) |
| V(1)-O(1)    | 1.944(3) | V(2)-O(5)    | 1.967(3) |
| P(1)-O(10)#1 | 1.531(2) | Co(1)-O(2)#4 | 2.122(4) |
| P(1)-O(10)#2 | 1.531(2) | Co(1)-O(2)   | 2.122(4) |
| P(1)-O(10)   | 1.531(3) | Co(1)-N(1)#1 | 2.125(4) |
| P(1)-O(10)#3 | 1.531(3) | Co(1)-N(1)   | 2.125(4) |
| Co(1)-N(1)#4 | 2.125(4) | Co(1)-N(1)#5 | 2.125(4) |

Symmetry transformations used to generate equivalent atoms:

#1  $-x+1, -y+3/2, z+0$       #2  $-y+5/4, x+1/4, -z+1/4$       #3  $y-1/4, -x+5/4, -z+1/4$   
#4  $y-1/4, -x+5/4, -z+5/4$       #5  $-y+5/4, x+1/4, -z+5/4$

**Table S2.** Selected bond lengths (Å) for compound **2**.

|               |           |             |          |
|---------------|-----------|-------------|----------|
| Na(1)-OW2B    | 2.315(13) | Mo(1)-O(9)  | 1.692(5) |
| Na(1)-O(14)#1 | 2.348(4)  | Mo(1)-O(19) | 1.719(4) |
| Na(1)-O(19)   | 2.385(5)  | Mo(1)-O(22) | 1.903(4) |
| Na(1)-O(15)#1 | 2.388(5)  | Mo(1)-O(23) | 1.948(4) |
| Na(1)-OW2A    | 2.404(12) | Mo(1)-O(16) | 2.146(4) |
| Na(1)-O(7)    | 2.468(5)  | Mo(1)-O(17) | 2.468(4) |
| Na(1)-O(17)   | 2.518(5)  | Mo(2)-O(2)  | 1.700(5) |
| Mo(3)-O(8)    | 1.706(4)  | Mo(2)-O(15) | 1.719(4) |
| Mo(3)-O(7)    | 1.713(5)  | Mo(2)-O(10) | 1.889(4) |
| Mo(3)-O(18)   | 1.894(5)  | Mo(2)-O(23) | 1.945(4) |
| Mo(3)-O(22)   | 1.924(4)  | Mo(2)-O(14) | 2.281(4) |
| Mo(3)-O(20)   | 2.284(4)  | Mo(2)-O(16) | 2.309(4) |
| Mo(3)-O(17)   | 2.343(4)  | Mo(5)-O(3)  | 1.697(5) |
| Mo(4)-O(4)    | 1.699(5)  | Mo(5)-O(1)  | 1.700(6) |
| Mo(4)-O(6)    | 1.701(4)  | Mo(5)-O(10) | 1.921(4) |
| Mo(4)-O(21)   | 1.917(5)  | Mo(5)-O(21) | 1.927(5) |
| Mo(4)-O(18)   | 1.935(4)  | Mo(5)-O(11) | 2.270(5) |
| Mo(4)-O(13)   | 2.238(4)  | Mo(5)-O(13) | 2.410(4) |
| Mo(4)-O(20)   | 2.344(4)  | P(1)-O(14)  | 1.504(4) |
| P(2)-O(5)     | 1.511(5)  | P(1)-O(13)  | 1.536(4) |
| P(2)-O(11)    | 1.517(5)  | P(1)-O(17)  | 1.537(4) |
| P(2)-O(20)    | 1.553(4)  | P(1)-O(12)  | 1.562(4) |
| P(2)-O(16)    | 1.562(4)  |             |          |

Symmetry transformations used to generate equivalent atoms:

#1 -x,-y,-z+1



**Table S3.** Selected bond lengths (Å) for compound **3**.

|               |           |               |           |
|---------------|-----------|---------------|-----------|
| Cd(1)-O(21)   | 2.264(10) | Cd(2)-O(7)#2  | 2.061(12) |
| Cd(1)-O(21)#1 | 2.264(10) | Cd(2)-O(7)    | 2.061(12) |
| Cd(1)-O(27)#1 | 2.276(10) | Cd(2)-O(2W)   | 2.186(11) |
| Cd(1)-O(27)   | 2.276(10) | Cd(2)-O(2W)#2 | 2.186(11) |
| Cd(1)-O(26)   | 2.310(9)  | Cd(2)-O(1W)#2 | 2.224(14) |
| Cd(1)-O(26)#1 | 2.310(9)  | Cd(2)-O(1W)   | 2.224(14) |
| Mo(1)-O(30)   | 1.676(11) | Mo(2)-O(14)   | 1.665(11) |
| Mo(1)-O(26)   | 1.936(10) | Mo(2)-O(16)   | 1.922(12) |
| Mo(1)-O(23)   | 1.948(11) | Mo(2)-O(21)   | 1.971(9)  |
| Mo(1)-O(4)    | 2.037(12) | Mo(2)-O(8)    | 2.074(11) |
| Mo(1)-O(24)   | 2.138(10) | Mo(2)-O(5)    | 2.128(11) |
| Mo(1)-O(25)   | 2.289(9)  | Mo(2)-O(22)   | 2.236(11) |
| Mo(3)-O(6)    | 1.661(12) | Mo(4)-O(17)   | 1.654(12) |
| Mo(3)-O(26)   | 1.952(10) | Mo(4)-O(18)   | 1.937(11) |
| Mo(3)-O(23)   | 1.954(11) | Mo(4)-O(27)   | 1.994(10) |
| Mo(3)-O(10)   | 2.041(11) | Mo(4)-O(15)   | 2.051(10) |
| Mo(3)-O(20)   | 2.085(11) | Mo(4)-O(20)   | 2.115(10) |
| Mo(3)-O(19)   | 2.286(9)  | Mo(4)-O(19)   | 2.314(11) |
| Mo(5)-O(9)    | 1.660(12) | Mo(6)-O(13)   | 1.705(11) |
| Mo(5)-O(16)   | 1.925(11) | Mo(6)-O(18)   | 1.918(11) |
| Mo(5)-O(21)   | 1.969(12) | Mo(6)-O(27)   | 1.976(10) |
| Mo(5)-O(11)   | 2.081(11) | Mo(6)-O(12)   | 2.073(11) |
| Mo(5)-O(24)   | 2.140(10) | Mo(6)-O(5)    | 2.118(12) |
| Mo(5)-O(25)   | 2.278(11) | Mo(6)-O(22)   | 2.250(11) |
| P(1)-O(29)    | 1.492(14) | P(3)-O(2)     | 1.506(11) |
| P(1)-O(4)     | 1.516(13) | P(3)-O(19)    | 1.538(11) |
| P(1)-O(11)    | 1.522(11) | P(3)-O(25)    | 1.546(11) |
| P(1)-O(28)    | 1.570(17) | P(3)-O(22)    | 1.582(10) |
| P(2)-O(7)     | 1.506(11) | P(4)-O(3)     | 1.499(11) |
| P(2)-O(15)    | 1.536(11) | P(4)-O(8)     | 1.512(12) |
| P(2)-O(10)    | 1.538(12) | P(4)-O(12)    | 1.518(13) |
| P(2)-O(1)     | 1.559(12) | P(4)-O(31)    | 1.569(12) |

Symmetry transformations used to generate equivalent atoms:

#1 -x,-y+1,-z      #2 -x,-y+1,-z+1

**Table S4.** Selected bond lengths (Å) for compound **4**.

|              |          |              |          |
|--------------|----------|--------------|----------|
| Mo(1)-O(1)   | 1.752(4) | Co(1)-O(3)#2 | 2.067(4) |
| Mo(1)-O(3)   | 1.753(4) | Co(1)-O(3)#1 | 2.067(4) |
| Mo(1)-O(2)#1 | 1.794(4) | Co(1)-O(5)#1 | 2.079(5) |
| Mo(1)-O(4)   | 2.095(4) | Co(1)-O(5)#2 | 2.079(5) |
| Mo(1)-O(6)#1 | 2.126(4) | Co(1)-O(1)   | 2.094(4) |
| Mo(1)-O(2)   | 2.201(4) | Co(1)-O(1)#3 | 2.094(4) |
| Co(2)-O(7)   | 1.923(5) | P(1)-O(7)    | 1.512(5) |
| Co(2)-O(7)#4 | 1.923(5) | P(1)-O(5)    | 1.528(5) |
| Co(2)-O(7)#5 | 1.923(5) | P(1)-O(4)    | 1.545(5) |
| Co(2)-O(7)#6 | 1.923(5) | P(1)-O(6)    | 1.549(5) |

Symmetry transformations used to generate equivalent atoms:

#1  $y-3/4, -x+5/4, z+1/4$     #2  $-y+5/4, x+1/4, -z+1/4$     #3  $-x+1/2, -y+3/2, -z+1/2$   
#4  $-y+5/4, x+1/4, -z-3/4$     #5  $y-1/4, -x+5/4, -z-3/4$     #6  $-x+1, -y+3/2, z+0$

**Table S5.** Hydrogen bonds for compounds **1-3**.

| Donor--H...Acceptor [ARU]                                                                                   | D - H | H...A | D...A     | D - H...A |
|-------------------------------------------------------------------------------------------------------------|-------|-------|-----------|-----------|
| <b>Compound 1</b>                                                                                           |       |       |           |           |
| C(4)--H(4A)..O(6) [ ]                                                                                       | 0.97  | 2.42  | 3.291(5)  | 150       |
| C(4) --H(4B)..O(1) [ 10544.01]                                                                              | 0.97  | 2.48  | 3.295(5)  | 142       |
| C(11)--H(11A)..O(4) [ 13555.01]                                                                             | 0.97  | 2.44  | 3.276(5)  | 145       |
| [10544.] = 1/4-y,-1/4+x,-1/4+z [13555.] = 1/2-x,1/2-y,1/2-z                                                 |       |       |           |           |
| <b>Compound 2</b>                                                                                           |       |       |           |           |
| C(11)--H(11B)..O(1) [ ]                                                                                     | 0.97  | 2.54  | 3.434(12) | 154       |
| C(2)--H(2A)..Ow(1) [ ]                                                                                      | 0.93  | 1.70  | 2.571(11) | 155       |
| C(3)--H(3A)..O(10) [1455.01]                                                                                | 0.93  | 2.30  | 3.166(12) | 154       |
| C(4)--H(4A)..O(15) [1455.01]                                                                                | 0.97  | 2.44  | 3.320(10) | 151       |
| C(27)--H(27A)..O(2) [1455.01]                                                                               | 0.93  | 2.53  | 3.363(10) | 149       |
| C(6)--H(6A)..O(9) [1465.01]                                                                                 | 0.93  | 2.39  | 3.249(10) | 154       |
| C(23)--H(23A)..O(6) [2655.01]                                                                               | 0.93  | 2.40  | 3.307(10) | 165       |
| C(18)--H(18A)..O(18) [2656.01]                                                                              | 0.97  | 2.50  | 3.451(11) | 165       |
| C(18)--H(18B)..O(9) [2756.01]                                                                               | 0.97  | 2.40  | 3.337(10) | 162       |
| C(15)--H(15A)..O(19) [2756.01]                                                                              | 0.93  | 2.19  | 3.045(10) | 152       |
| [1455.] = -1+x,y,z [1465.] = -1+x,1+y,z [2655.] = 1-x,-y,-z<br>[2656.] = 1-x,-y,1-z [2756.] = 2-x,-y,1-z    |       |       |           |           |
| <b>Compound 3</b>                                                                                           |       |       |           |           |
| C(3)--H(3A)..O(6) [2556.01]                                                                                 | 0.93  | 2.27  | 3.13(2)   | 155       |
| C(1)--H(1A)..O(13) [2566.01]                                                                                | 0.93  | 2.26  | 3.08(2)   | 148       |
| C(22)--H(22A)..O(1W) [2566.01]                                                                              | 0.93  | 2.51  | 3.39(3)   | 156       |
| C(12)--H(12A)..Ow(6) [2656.08]                                                                              | 0.93  | 2.54  | 3.43(3)   | 159       |
| C(17)--H(17A)..O(14) [2665.01]                                                                              | 0.93  | 2.33  | 3.25(3)   | 169       |
| C(14)--H(14A)..O(16) [2666.01]                                                                              | 0.93  | 2.46  | 3.35(2)   | 161       |
| [2556.] = -x,-y,1-z [2566.] = -x,1-y,1-z [2656.] = 1-x,-y,1-z<br>[2665.] = 1-x,1-y,-z [2666.] = 1-x,1-y,1-z |       |       |           |           |

**Table S6.** The bond valence sum calculations for V and Mo atoms in compounds **1-4**.

---

|                   |       |     |       |
|-------------------|-------|-----|-------|
| <b>Compound 1</b> |       |     |       |
| Mo1               | 5.976 | V1  | 4.508 |
| Mo2               | 5.991 | V2  | 4.131 |
| <b>Compound 2</b> |       |     |       |
| Mo1               | 6.100 | Mo4 | 6.116 |
| Mo2               | 6.065 | Mo5 | 6.056 |
| Mo3               | 6.071 |     |       |
| <b>Compound 3</b> |       |     |       |
| Mo1               | 4.897 | Mo4 | 4.890 |
| Mo2               | 4.935 | Mo5 | 4.888 |
| Mo3               | 4.991 | Mo6 | 4.753 |
| <b>Compound 4</b> |       |     |       |
| Mo1               | 5.998 |     |       |

---
